# Supplementary material for: Development of a robust RNA-based classifier to accurately determine ER, PR, and HER2 status in breast cancer clinical samples
Source: Springer Nature journal article supplement (doi:10.1007/s10549-014-3163-8), 2014-10-22
Supplement: MOESM1 [file 8846678]

(a)

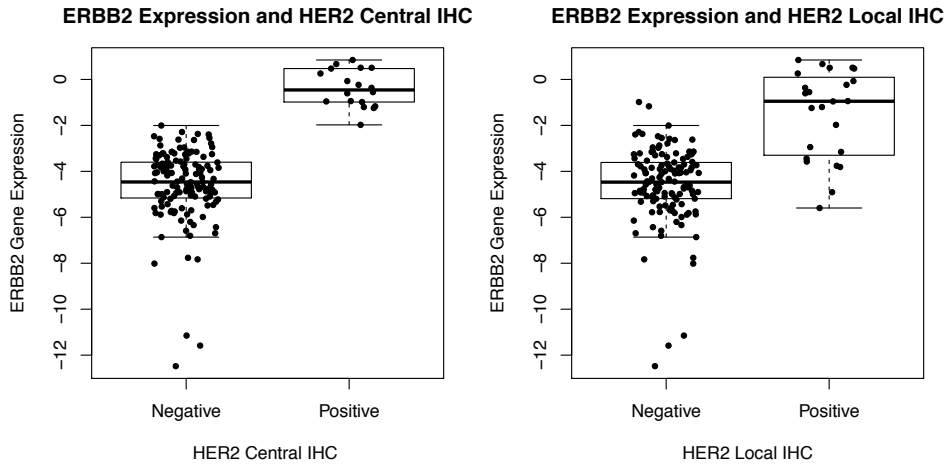

(b)

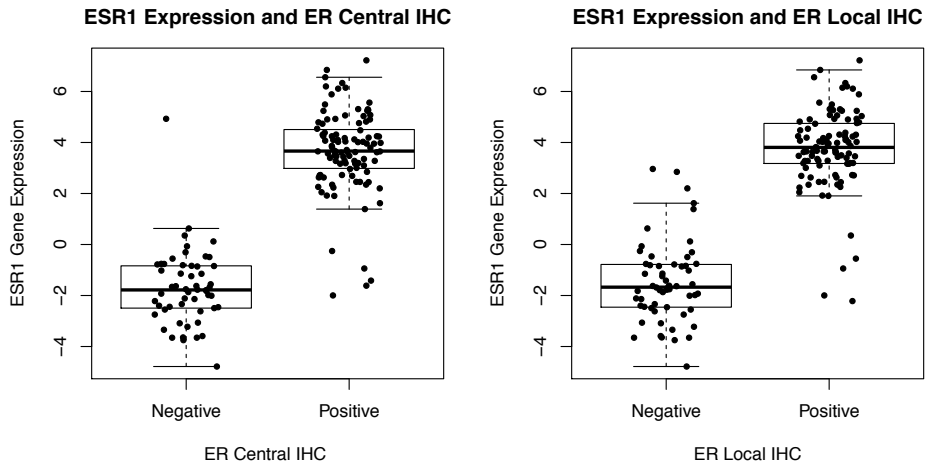

(c)

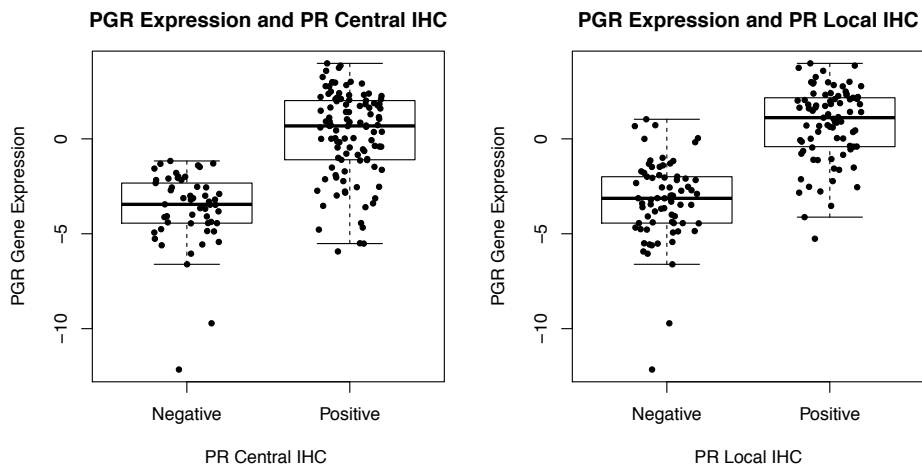

**Supplemental Figure 1** Target gene expression of (a) ERBB2 (b) ESR1 (c) PGR by central and local IHC status



### PR+ (Allred $\geq$ 4)

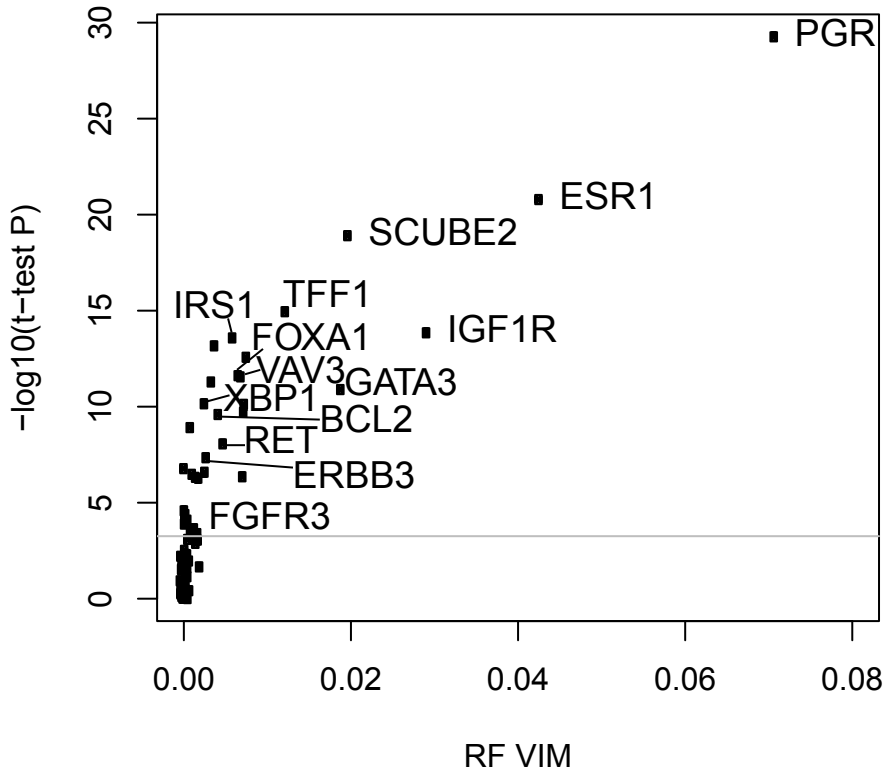

**Supplemental Figure 3** Multivariate variable importance measures (VIM) by random forests for PR prediction. PR positivity was defined as Allred score  $\geq$  4. Y axes are  $-\log_{10}$  based P values of the two group t-test between central IHC positive and negative groups, and (Bonferroni) adjusted P value 0.05 is marked with gray lines. Genes with two sample t-test adjusted p values  $\leq$  0.05 and fold change  $\geq$  2 were marked with gene symbols

**ERBB2**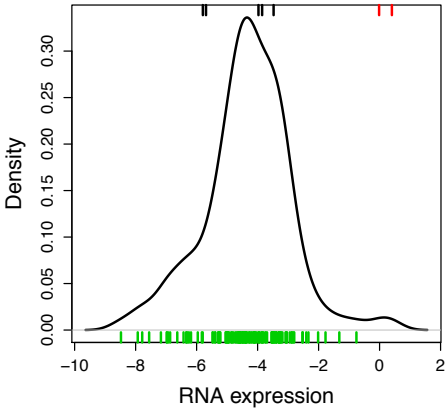**ESR1**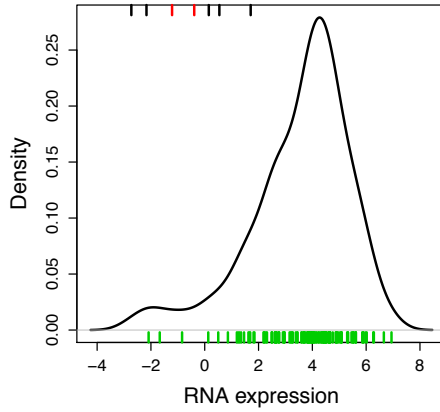**PGR**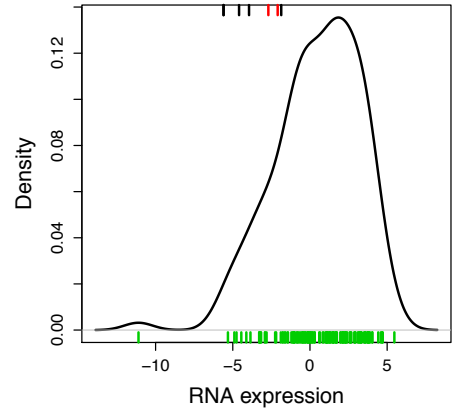

**Supplemental Figure 4** Distribution of *ERBB2*, *ESR1* and *PGR* mRNA of test set 2, a commercially procured sample set of 136 HR+ breast cancers. Black, red and green marks are samples predicted by RFP to be triple negative, HER2+HR-, and HR+ breast cancers

**Supplemental Table 1** Performance of the different multivariate prediction methods in terms of predicting local IHC status for an additional set of USO 01062 study samples

|               | <b>Accuracy</b> | <b>Specificity</b> | <b>Sensitivity</b> |
|---------------|-----------------|--------------------|--------------------|
| <b>HER2</b>   |                 |                    |                    |
| <b>RF</b>     | 0.92 (579/628)  | 0.99 (538/545)     | 0.49 (41/83)       |
| <b>RF+KNN</b> | 0.92 (580/628)  | 0.98 (536/545)     | 0.52 (43/83)       |
| <b>PAM</b>    | 0.91(571/628)   | 0.99 (541/545)     | 0.36 (30/83)       |
| <b>TGP</b>    | 0.92 (575/628)  | 0.99 (540/545)     | 0.42 (35/83)       |
| <b>ER</b>     |                 |                    |                    |
| <b>RF</b>     | 0.92 (586/634)  | 0.90 (249/277)     | 0.94 (337/357)     |
| <b>RF+KNN</b> | 0.90 (572/634)  | 0.86 (239/277)     | 0.93 (333/357)     |
| <b>PAM</b>    | 0.90 (570/634)  | 0.84 (232/277)     | 0.95 (338/357)     |
| <b>TGP</b>    | 0.93 (591/634)  | 0.92 (255/277)     | 0.94 (336/357)     |
| <b>PR</b>     |                 |                    |                    |
| <b>RF</b>     | 0.82 (517/634)  | 0.72(246/340)      | 0.92 (271/294)     |
| <b>RF+KNN</b> | 0.82 (519/634)  | 0.73 (249/340)     | 0.92 (270/294)     |
| <b>PAM</b>    | 0.81 (516/634)  | 0.72 (244/340)     | 0.93 (272/294)     |
| <b>TGP</b>    | 0.82 (571/634)  | 0.72 (245/340)     | 0.92 (270/294)     |

**Supplemental Table 2** Prediction performance of test datasets 2 and 3

|                            |        | <b>Accuracy</b> | <b>TN</b> | <b>HER2+HR-</b> | <b>HR+</b> |
|----------------------------|--------|-----------------|-----------|-----------------|------------|
| HR+ collection             | RFP    | 0.95            | 5         | 2               | 129        |
|                            | PAM    | 0.96            | 4         | 2               | 130        |
|                            | RF-KNN | 0.94            | 6         | 2               | 128        |
|                            | TGP    | 0.94            | 8         | 2               | 126        |
| Triple negative collection | RFP    | 0.92            | 34        | 2               | 1          |
|                            | PAM    | 0.73            | 27        | 2               | 7          |
|                            | RF-KNN | 0.92            | 34        | 2               | 1          |
|                            | TGP    | 0.84            | 31        | 2               | 4          |
